# Supplementary material for: Microbiome Restructuring: Dominant Coral Bacterium Endozoicomonas Species Respond Differentially to Environmental Changes
Source: PubMed Central journal article supplement (PMC9426584; doi:10.1128/msystems.00359-22), 2022-06-15

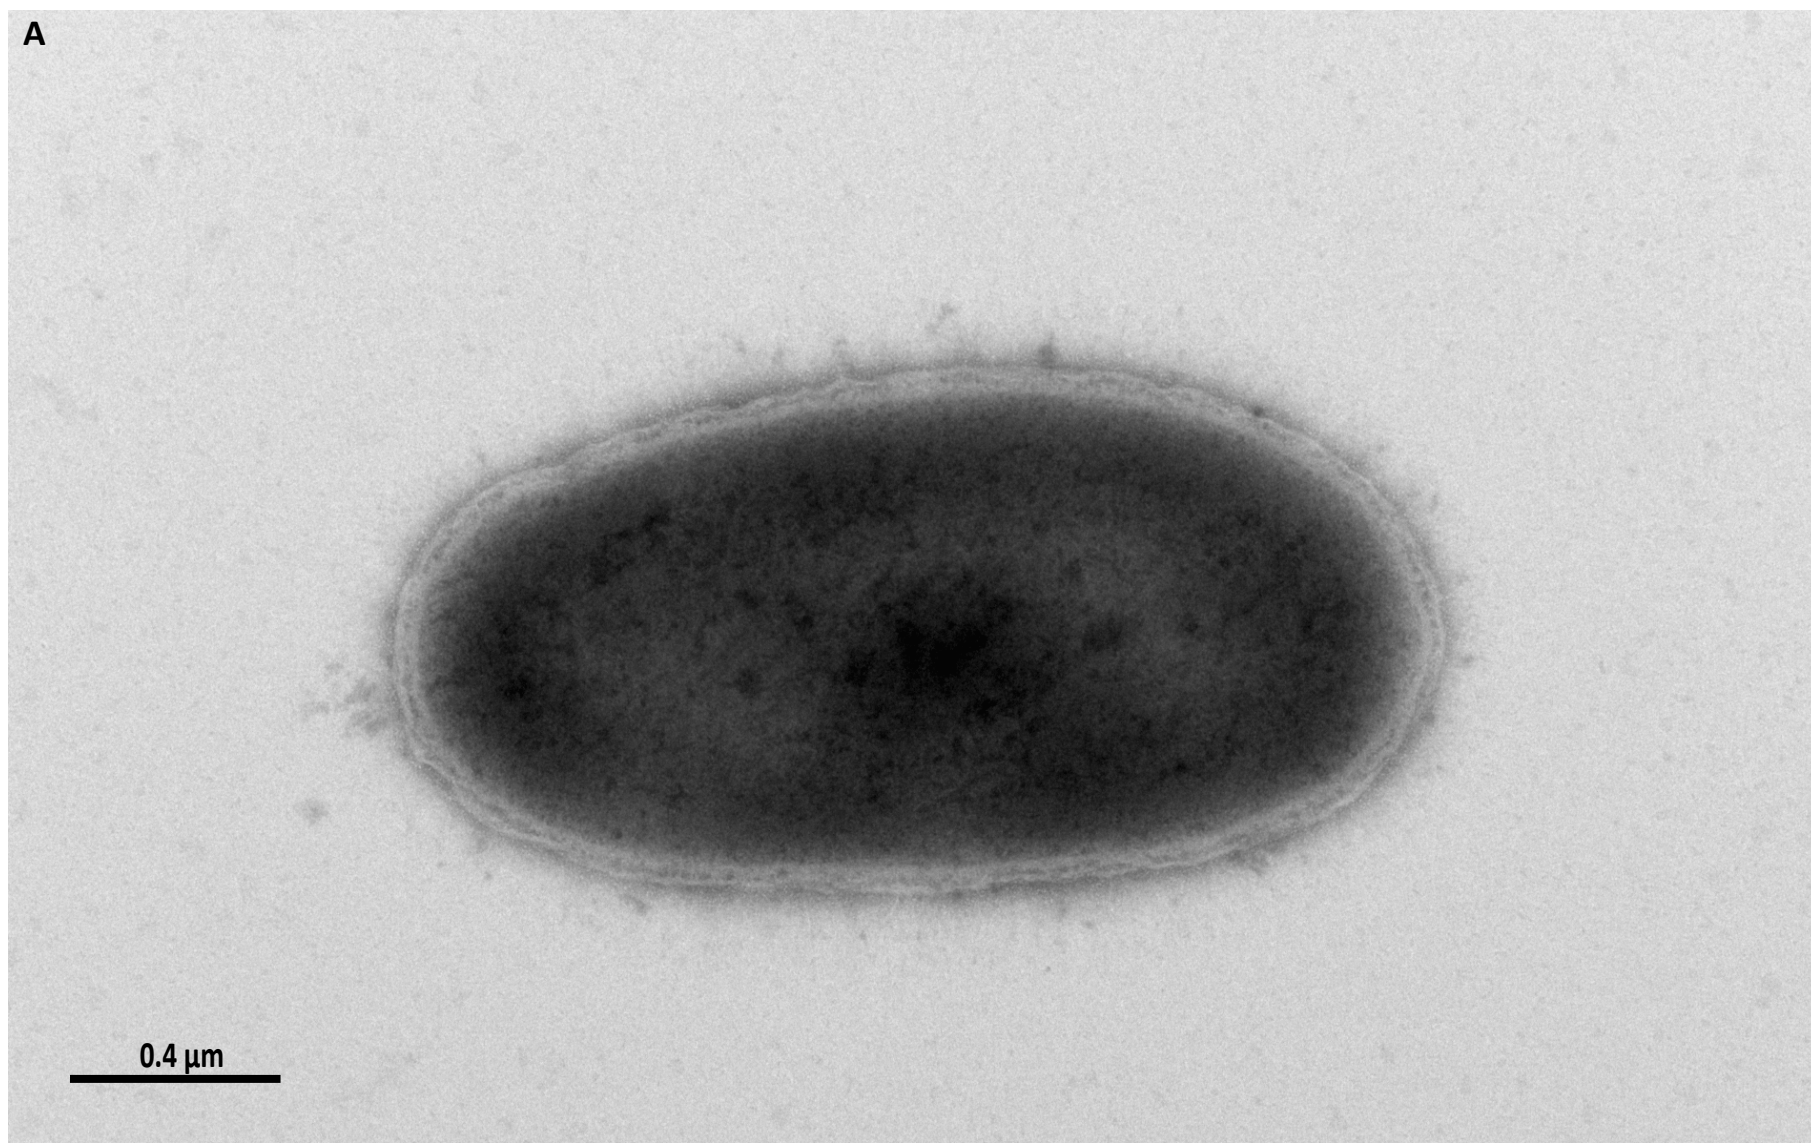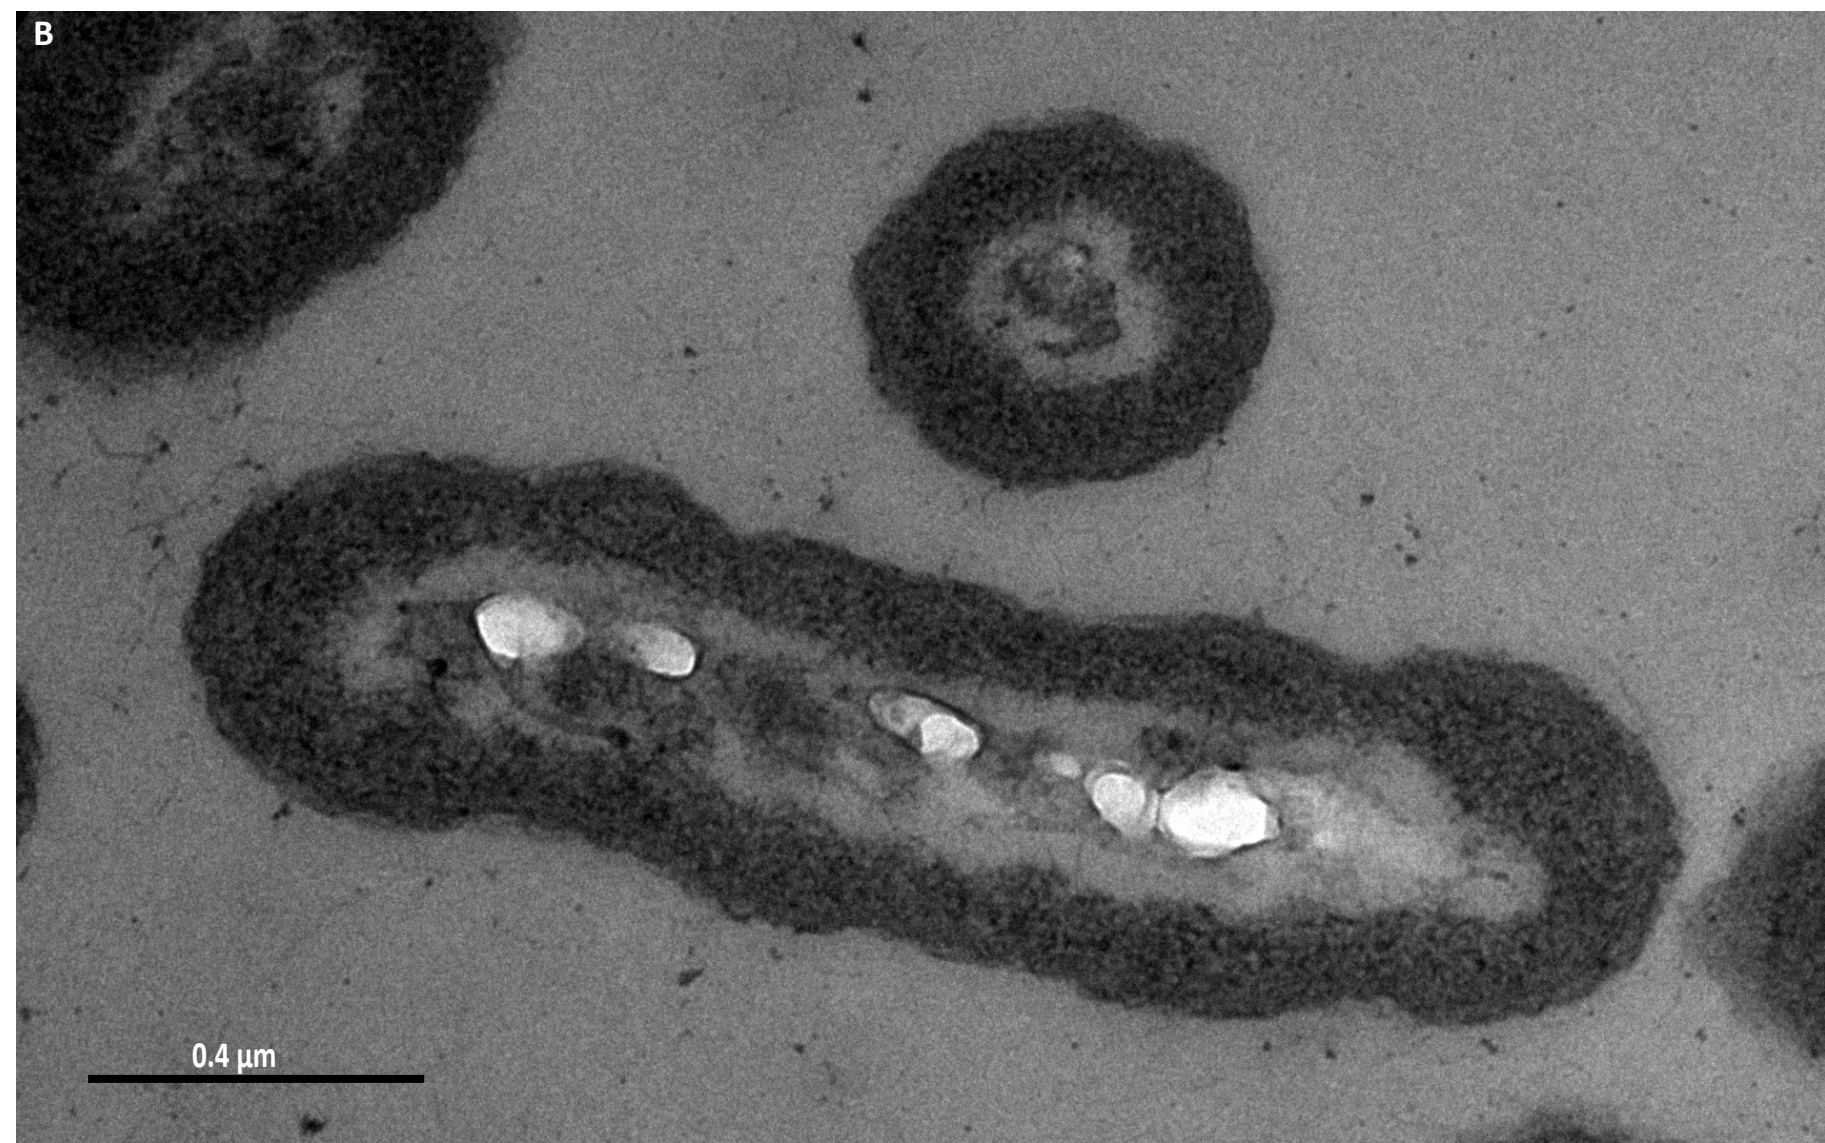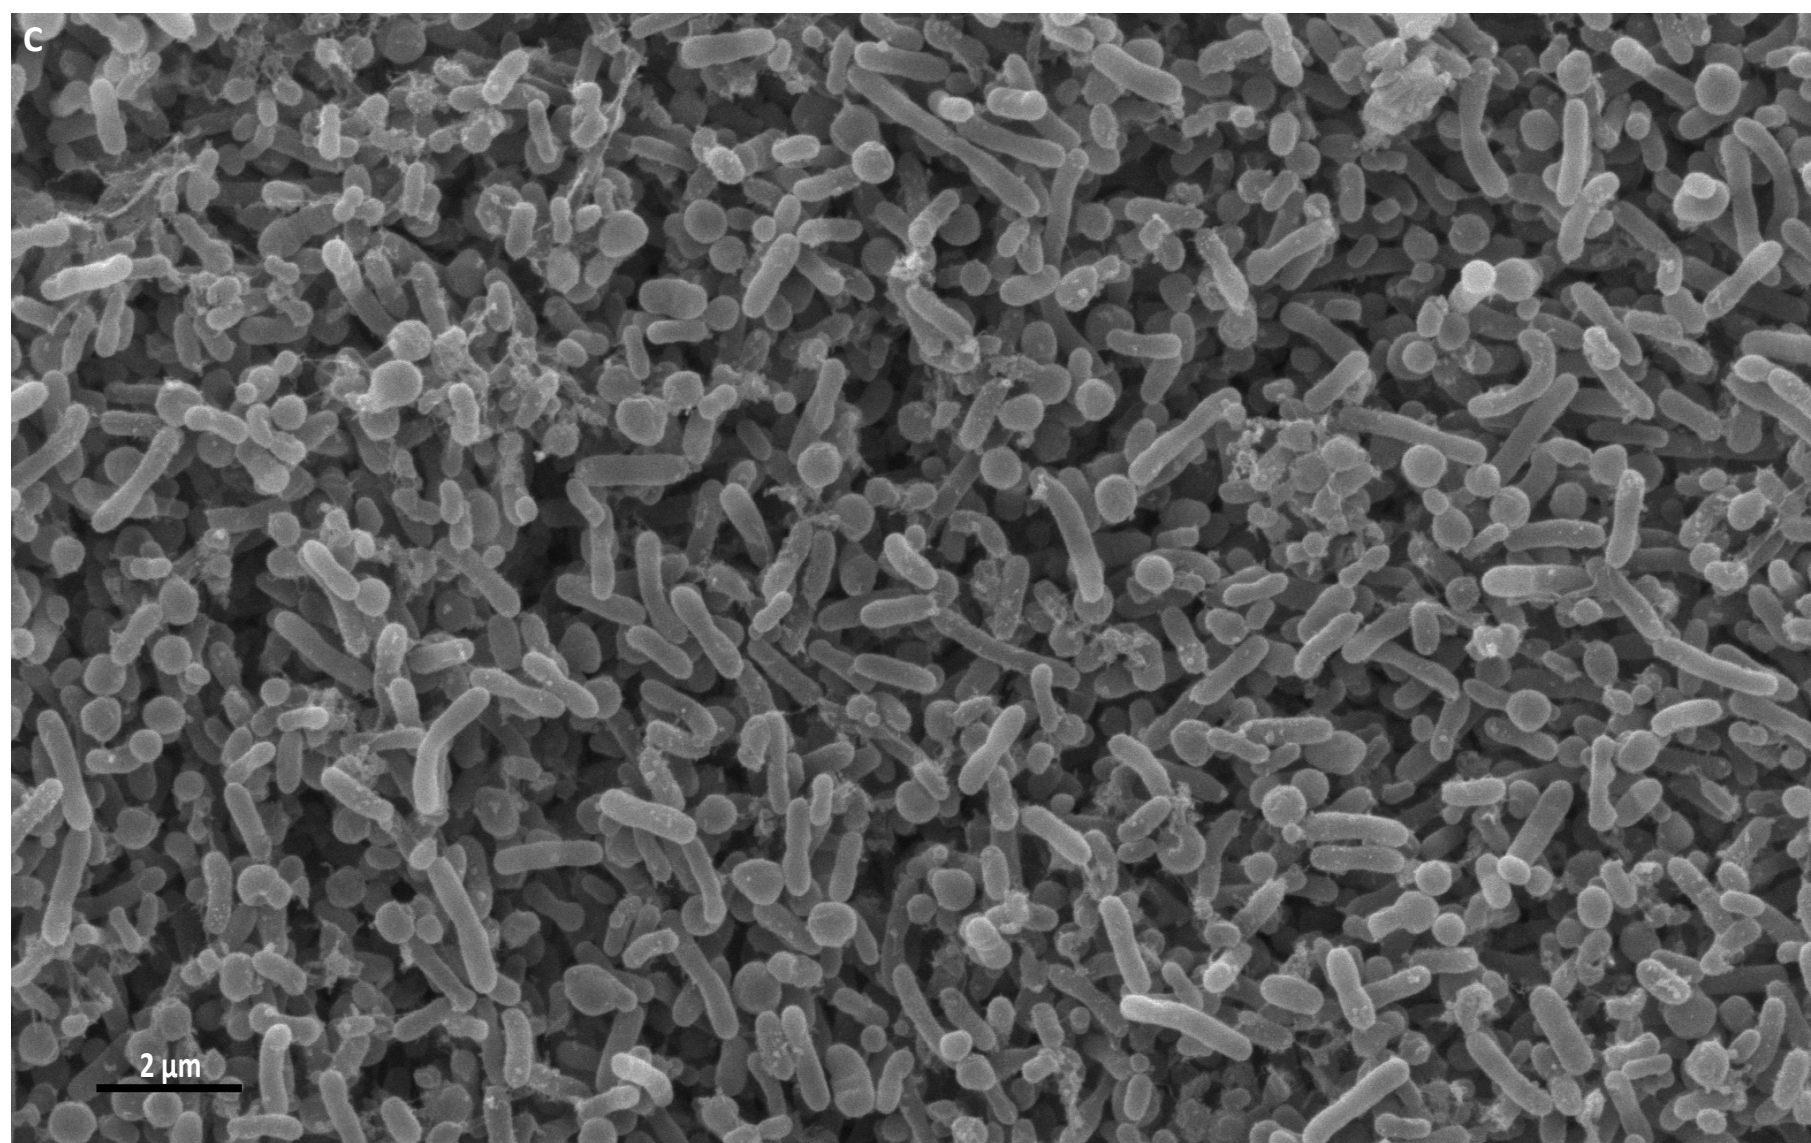

Supplement: msystems.00359-22-s0004.pdf [file msystems.00359-22-s0004.pdf]
